# Supplementary material
Source: MDPI journal article supplement (https://www.mdpi.com/2073-4441/15/24/4318)
Supplement: s1 [file s1]

# ZnO-CuO Nanocomposite as an Efficient Adsorbent for As(III) Removal from Water

Jesús Plácido Medina Salas <sup>1,\*</sup>, Francisco Gamarra Gómez <sup>1</sup>, Elisban Juani Sacari Sacari <sup>1,2,\*</sup>,  
Wilson Orlando Lanchipa Ramos <sup>1</sup>, Rocío María Tamayo Calderón <sup>3</sup>, Efracio Mamani Flores <sup>4</sup>,  
Víctor Yapuchura Platero <sup>5</sup>, Walter Dimas Florez Ponce de León <sup>6</sup> and Elmer Marcial Limache Sandoval <sup>7</sup>

- <sup>1</sup> Laboratorio de Nanotecnología (NanoLab), Facultad de Ingeniería, Universidad Nacional Jorge Basadre Grohmann, Av. Miraflores s/n, Tacna 23003, Peru; fgamarra@unjbgu.edu.pe (F.G.G.); lanchipa09@gmail.com (W.O.L.R.)
- <sup>2</sup> Centro de Energías Renovables de Tacna (CERT), Facultad de Ciencias, Universidad Nacional Jorge Basadre Grohmann, Av. Miraflores s/n, Tacna 23003, Peru
- <sup>3</sup> Centro de Microscopia Electrónica, Facultad de Ingeniería de Procesos, Universidad Nacional de San Agustín, Arequipa 04001, Peru; rtamayoca@unsa.edu.pe
- <sup>4</sup> Departamento de Física Aplicada, Facultad de Ciencias, Universidad Nacional Jorge Basadre Grohmann, Av. Miraflores s/n, Tacna 23003, Peru; emamanif@unjbgu.edu.pe
- <sup>5</sup> Departamento de Ingeniería Civil, Facultad de Ingeniería Civil, Arquitectura y Geotecnia, Universidad Nacional Jorge Basadre Grohmann, Av. Miraflores s/n, Tacna 23003, Peru; vyapuchurap@unjbgu.edu.pe
- <sup>6</sup> Departamento de Química, Facultad de Ingeniería, Universidad Nacional Jorge Basadre Grohmann, Av. Miraflores s/n, Tacna 23003, Peru; wflorezp@unjbgu.edu.pe
- <sup>7</sup> Grupo de Investigación HIDROCIENCIA, Facultad de Ciencias de la Salud, Universidad Privada de Tacna, Av. Jorge Basadre Grohmann s/n, Pocollay, Tacna 23000, Peru; elmlimache@upt.pe
- \* Correspondence: jmedinas@unjbgu.edu.pe (J.P.M.S.); esacaris@unjbgu.edu.pe (E.J.S.S.)

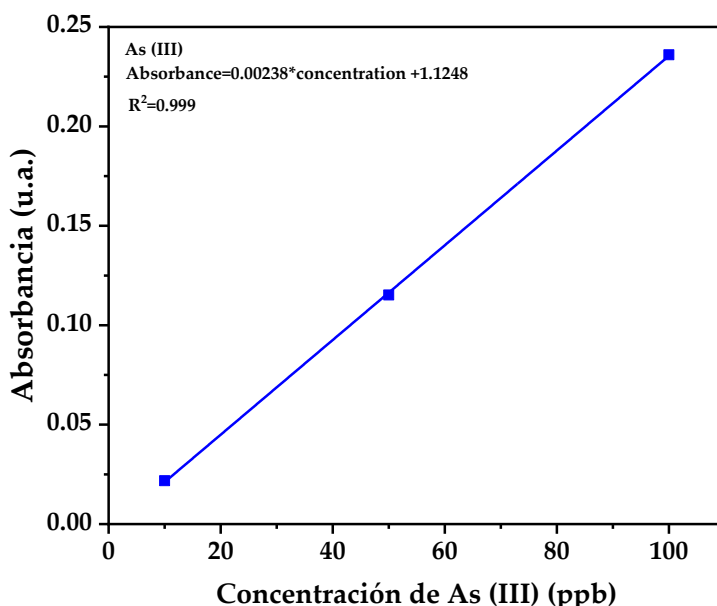

**Figure S1.** Graphite furnace Atomic absorption spectrometer calibration curve of arsenic (III)

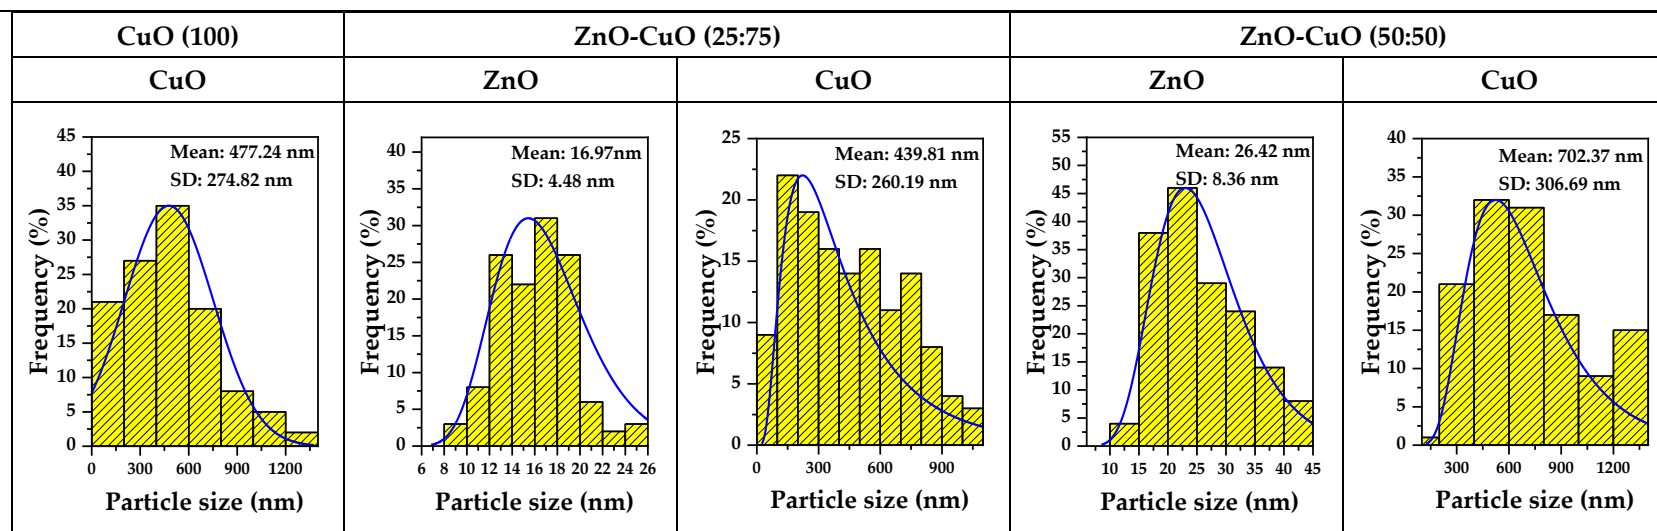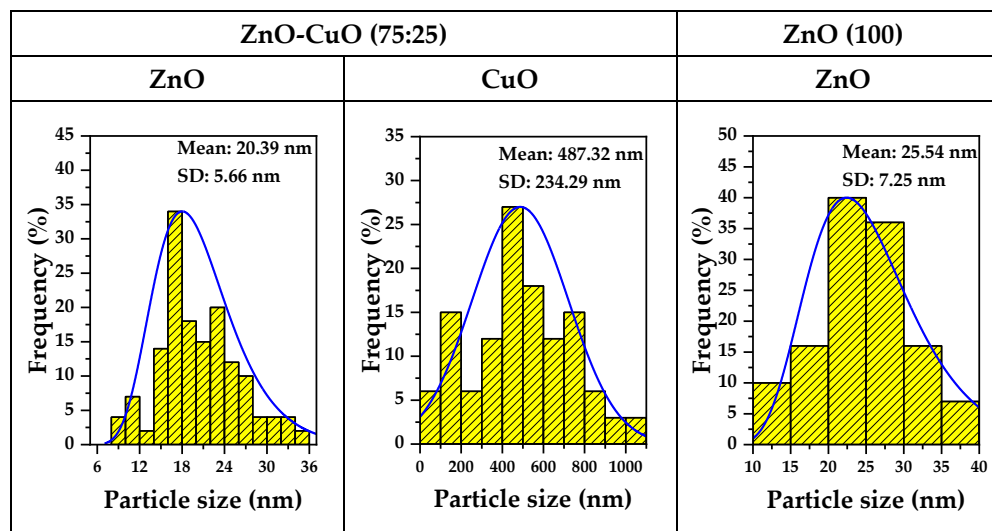

**Figure S2.** Particle size distribution of pure ZnO, CuO and ZnO-CuO nanocomposite
